# Supplementary material
Source: PubMed Central journal article supplement (PMC4915379)
Supplement: NIHMS741060-supplement.pdf [file NIHMS741060-supplement.pdf]

Supplementary Information for:

**Synthesis and structural studies of two pyridine-armed reinforced cyclen chelators and their transition metal complexes**

Kevin R. Wilson<sup>a</sup>, Desiray J. Cannon-Smith<sup>a</sup>, Benjamin P. Burke<sup>b</sup>, Orry C. Birdsong<sup>a</sup>, Stephen J. Archibald<sup>b</sup> and Timothy J. Hubin<sup>a\*</sup>

|                                                         |             |
|---------------------------------------------------------|-------------|
| Crystal Data for [Zn(4)Cl]PF <sub>6</sub>               | pages 2-8   |
| Crystal Data for [Ni(4)Cl]PF <sub>6</sub>               | pages 9-16  |
| Crystal Data for [Cu(4)](PF <sub>6</sub> ) <sub>2</sub> | pages 17-25 |

Table 1. Crystal data and structure refinement for sja3\_12.

|                                   |                                                                       |                            |
|-----------------------------------|-----------------------------------------------------------------------|----------------------------|
| Identification code               | shelxl                                                                |                            |
| Empirical formula                 | C <sub>17</sub> H <sub>29</sub> Cl F <sub>6</sub> N <sub>5</sub> P Zn |                            |
| Formula weight                    | 549.24                                                                |                            |
| Temperature                       | 150(2) K                                                              |                            |
| Wavelength                        | 0.71073 Å                                                             |                            |
| Crystal system                    | monoclinic                                                            |                            |
| Space group                       | P21/c                                                                 |                            |
| Unit cell dimensions              | a = 11.584(2) Å                                                       | $\alpha = 90^\circ$ .      |
|                                   | b = 11.729 (3) Å                                                      | $\beta = 96.95(2)^\circ$ . |
|                                   | c = 15.730(3) Å                                                       | $\gamma = 90^\circ$ .      |
| Volume                            | 2121.6(9) Å <sup>3</sup>                                              |                            |
| Z                                 | 4                                                                     |                            |
| Density (calculated)              | 1.720 Mg/m <sup>3</sup>                                               |                            |
| Absorption coefficient            | 1.427 mm <sup>-1</sup>                                                |                            |
| F(000)                            | 1128                                                                  |                            |
| Crystal size                      | 0.20 x 0.18 x 0.16 mm <sup>3</sup>                                    |                            |
| Theta range for data collection   | 2.48 to 25.00°.                                                       |                            |
| Index ranges                      | -13<=h<=13, 0<=k<=13, 0<=l<=18                                        |                            |
| Reflections collected             | 3733                                                                  |                            |
| Independent reflections           | 3733 [R(int) = 0.0000]                                                |                            |
| Completeness to theta = 25.00°    | 99.9 %                                                                |                            |
| Refinement method                 | Full-matrix least-squares on F <sup>2</sup>                           |                            |
| Data / restraints / parameters    | 3733 / 0 / 282                                                        |                            |
| Goodness-of-fit on F <sup>2</sup> | 0.712                                                                 |                            |
| Final R indices [I>2sigma(I)]     | R1 = 0.0288, wR2 = 0.0623                                             |                            |
| R indices (all data)              | R1 = 0.0598, wR2 = 0.0660                                             |                            |
| Extinction coefficient            | 0.00086(14)                                                           |                            |
| Largest diff. peak and hole       | 0.276 and -0.512 e.Å <sup>-3</sup>                                    |                            |

Table 2. Atomic coordinates ( $\times 10^4$ ) and equivalent isotropic displacement parameters ( $\text{\AA}^2 \times 10^3$ ) for sja3\_12.  $U(\text{eq})$  is defined as one third of the trace of the orthogonalized  $U^{ij}$  tensor.

|       | x        | y        | z       | $U(\text{eq})$ |
|-------|----------|----------|---------|----------------|
| Zn(1) | 8137(1)  | 2526(1)  | 574(1)  | 23(1)          |
| Cl(1) | 9348(1)  | 2555(1)  | -550(1) | 31(1)          |
| N(1)  | 9042(2)  | 1260(2)  | 1507(2) | 24(1)          |
| N(2)  | 6990(2)  | 2603(3)  | 1579(2) | 25(1)          |
| N(3)  | 7176(3)  | 4114(2)  | 234(2)  | 27(1)          |
| N(4)  | 9176(3)  | 3604(2)  | 1460(2) | 25(1)          |
| N(5)  | 7445(3)  | 964(2)   | 64(2)   | 26(1)          |
| C(1)  | 8248(3)  | 1034(3)  | 2167(2) | 28(1)          |
| C(2)  | 7004(3)  | 1438(3)  | 1901(2) | 27(1)          |
| C(3)  | 5883(3)  | 2935(3)  | 1075(2) | 31(1)          |
| C(4)  | 6014(3)  | 4031(3)  | 561(2)  | 30(1)          |
| C(5)  | 7927(3)  | 5036(3)  | 677(2)  | 32(1)          |
| C(6)  | 9172(3)  | 4660(3)  | 962(2)  | 29(1)          |
| C(7)  | 10310(3) | 3014(3)  | 1575(2) | 31(1)          |
| C(8)  | 10172(3) | 1775(3)  | 1868(2) | 29(1)          |
| C(9)  | 7388(3)  | 3453(3)  | 2242(2) | 31(1)          |
| C(10) | 8697(3)  | 3740(3)  | 2283(2) | 30(1)          |
| C(11) | 9169(3)  | 264(3)   | 962(2)  | 28(1)          |
| C(12) | 8111(3)  | 66(3)    | 312(2)  | 25(1)          |
| C(13) | 7899(3)  | -1001(3) | -46(2)  | 30(1)          |
| C(14) | 6977(3)  | -1134(3) | -685(2) | 34(1)          |
| C(15) | 6295(3)  | -206(3)  | -939(2) | 36(1)          |
| C(16) | 6552(3)  | 819(3)   | -554(2) | 31(1)          |
| C(17) | 7014(4)  | 4342(3)  | -706(2) | 36(1)          |
| P(1)  | 3624(1)  | 2634(1)  | 3146(1) | 29(1)          |
| F(1)  | 3793(2)  | 3884(2)  | 3534(1) | 45(1)          |
| F(2)  | 3454(2)  | 1388(2)  | 2760(2) | 56(1)          |
| F(3)  | 2296(2)  | 2644(2)  | 3307(1) | 50(1)          |
| F(4)  | 3273(2)  | 3158(2)  | 2211(1) | 45(1)          |
| F(5)  | 4960(2)  | 2613(2)  | 2987(1) | 49(1)          |
| F(6)  | 3984(2)  | 2122(2)  | 4081(1) | 42(1)          |

Table 3. Bond lengths [Å] and angles [°] for sja3\_12.

---

|             |           |
|-------------|-----------|
| Zn(1)-N(5)  | 2.118(3)  |
| Zn(1)-N(4)  | 2.142(3)  |
| Zn(1)-N(2)  | 2.185(2)  |
| Zn(1)-N(3)  | 2.202(3)  |
| Zn(1)-N(1)  | 2.255(3)  |
| Zn(1)-Cl(1) | 2.3870(8) |
| N(1)-C(11)  | 1.467(4)  |
| N(1)-C(8)   | 1.489(4)  |
| N(1)-C(1)   | 1.492(4)  |
| N(2)-C(2)   | 1.457(4)  |
| N(2)-C(3)   | 1.476(4)  |
| N(2)-C(9)   | 1.476(4)  |
| N(3)-C(17)  | 1.493(4)  |
| N(3)-C(4)   | 1.501(4)  |
| N(3)-C(5)   | 1.505(4)  |
| N(4)-C(6)   | 1.466(4)  |
| N(4)-C(10)  | 1.477(4)  |
| N(4)-C(7)   | 1.476(4)  |
| N(5)-C(12)  | 1.335(4)  |
| N(5)-C(16)  | 1.342(4)  |
| C(1)-C(2)   | 1.526(5)  |
| C(3)-C(4)   | 1.536(5)  |
| C(5)-C(6)   | 1.523(5)  |
| C(7)-C(8)   | 1.539(5)  |
| C(9)-C(10)  | 1.546(5)  |
| C(11)-C(12) | 1.516(5)  |
| C(12)-C(13) | 1.383(5)  |
| C(13)-C(14) | 1.384(5)  |
| C(14)-C(15) | 1.375(5)  |
| C(15)-C(16) | 1.364(5)  |
| P(1)-F(2)   | 1.586(2)  |
| P(1)-F(1)   | 1.590(2)  |
| P(1)-F(3)   | 1.589(2)  |

|                  |            |
|------------------|------------|
| P(1)-F(6)        | 1.596(2)   |
| P(1)-F(5)        | 1.598(2)   |
| P(1)-F(4)        | 1.601(2)   |
| N(5)-Zn(1)-N(4)  | 156.13(11) |
| N(5)-Zn(1)-N(2)  | 94.28(11)  |
| N(4)-Zn(1)-N(2)  | 81.26(11)  |
| N(5)-Zn(1)-N(3)  | 118.85(10) |
| N(4)-Zn(1)-N(3)  | 83.49(11)  |
| N(2)-Zn(1)-N(3)  | 78.88(11)  |
| N(5)-Zn(1)-N(1)  | 78.58(11)  |
| N(4)-Zn(1)-N(1)  | 77.55(9)   |
| N(2)-Zn(1)-N(1)  | 80.34(10)  |
| N(3)-Zn(1)-N(1)  | 153.69(10) |
| N(5)-Zn(1)-Cl(1) | 87.75(8)   |
| N(4)-Zn(1)-Cl(1) | 98.00(8)   |
| N(2)-Zn(1)-Cl(1) | 176.51(9)  |
| N(3)-Zn(1)-Cl(1) | 97.66(8)   |
| N(1)-Zn(1)-Cl(1) | 102.86(8)  |
| C(11)-N(1)-C(8)  | 113.6(3)   |
| C(11)-N(1)-C(1)  | 112.2(3)   |
| C(8)-N(1)-C(1)   | 113.2(3)   |
| C(11)-N(1)-Zn(1) | 102.5(2)   |
| C(8)-N(1)-Zn(1)  | 107.4(2)   |
| C(1)-N(1)-Zn(1)  | 107.0(2)   |
| C(2)-N(2)-C(3)   | 114.0(3)   |
| C(2)-N(2)-C(9)   | 113.5(3)   |
| C(3)-N(2)-C(9)   | 112.2(3)   |
| C(2)-N(2)-Zn(1)  | 103.3(2)   |
| C(3)-N(2)-Zn(1)  | 100.80(19) |
| C(9)-N(2)-Zn(1)  | 111.9(2)   |
| C(17)-N(3)-C(4)  | 109.9(3)   |
| C(17)-N(3)-C(5)  | 109.0(3)   |
| C(4)-N(3)-C(5)   | 112.3(3)   |
| C(17)-N(3)-Zn(1) | 113.1(2)   |

|                   |            |
|-------------------|------------|
| C(4)-N(3)-Zn(1)   | 108.1(2)   |
| C(5)-N(3)-Zn(1)   | 104.4(2)   |
| C(6)-N(4)-C(10)   | 113.6(3)   |
| C(6)-N(4)-C(7)    | 114.0(3)   |
| C(10)-N(4)-C(7)   | 111.5(3)   |
| C(6)-N(4)-Zn(1)   | 100.7(2)   |
| C(10)-N(4)-Zn(1)  | 113.1(2)   |
| C(7)-N(4)-Zn(1)   | 103.0(2)   |
| C(12)-N(5)-C(16)  | 118.7(3)   |
| C(12)-N(5)-Zn(1)  | 113.1(2)   |
| C(16)-N(5)-Zn(1)  | 127.4(2)   |
| N(1)-C(1)-C(2)    | 113.3(3)   |
| N(2)-C(2)-C(1)    | 110.9(3)   |
| N(2)-C(3)-C(4)    | 111.6(3)   |
| N(3)-C(4)-C(3)    | 112.6(3)   |
| N(3)-C(5)-C(6)    | 113.7(3)   |
| N(4)-C(6)-C(5)    | 110.1(3)   |
| N(4)-C(7)-C(8)    | 110.9(3)   |
| N(1)-C(8)-C(7)    | 112.8(3)   |
| N(2)-C(9)-C(10)   | 113.4(3)   |
| N(4)-C(10)-C(9)   | 114.2(3)   |
| N(1)-C(11)-C(12)  | 112.7(3)   |
| N(5)-C(12)-C(13)  | 121.8(3)   |
| N(5)-C(12)-C(11)  | 117.9(3)   |
| C(13)-C(12)-C(11) | 120.2(3)   |
| C(12)-C(13)-C(14) | 118.7(3)   |
| C(15)-C(14)-C(13) | 119.2(3)   |
| C(16)-C(15)-C(14) | 118.8(3)   |
| N(5)-C(16)-C(15)  | 122.7(3)   |
| F(2)-P(1)-F(1)    | 179.96(16) |
| F(2)-P(1)-F(3)    | 89.44(15)  |
| F(1)-P(1)-F(3)    | 90.57(14)  |
| F(2)-P(1)-F(6)    | 90.71(13)  |
| F(1)-P(1)-F(6)    | 89.33(12)  |
| F(3)-P(1)-F(6)    | 90.37(12)  |

|                |            |
|----------------|------------|
| F(2)-P(1)-F(5) | 90.18(15)  |
| F(1)-P(1)-F(5) | 89.81(14)  |
| F(3)-P(1)-F(5) | 179.50(18) |
| F(6)-P(1)-F(5) | 89.31(12)  |
| F(2)-P(1)-F(4) | 89.74(13)  |
| F(1)-P(1)-F(4) | 90.22(13)  |
| F(3)-P(1)-F(4) | 90.03(12)  |
| F(6)-P(1)-F(4) | 179.40(14) |
| F(5)-P(1)-F(4) | 90.29(12)  |

---

Symmetry transformations used to generate equivalent atoms:

Table 4. Anisotropic displacement parameters ( $\text{\AA}^2 \times 10^3$ ) for sja3\_12. The anisotropic displacement factor exponent takes the form:  $-2\pi^2 [ h^2 a^{*2} U^{11} + \dots + 2 h k a^* b^* U^{12} ]$

|       | $U^{11}$ | $U^{22}$ | $U^{33}$ | $U^{23}$ | $U^{13}$ | $U^{12}$ |
|-------|----------|----------|----------|----------|----------|----------|
| Zn(1) | 26(1)    | 23(1)    | 21(1)    | 0(1)     | 3(1)     | 1(1)     |
| Cl(1) | 36(1)    | 34(1)    | 26(1)    | 2(1)     | 9(1)     | 3(1)     |
| N(1)  | 23(2)    | 23(2)    | 25(2)    | -1(1)    | 2(1)     | -1(1)    |
| N(2)  | 27(1)    | 25(2)    | 24(1)    | 0(1)     | 5(1)     | 2(2)     |
| N(3)  | 33(2)    | 27(2)    | 21(2)    | 1(1)     | 2(1)     | 3(1)     |
| N(4)  | 30(2)    | 24(2)    | 23(2)    | 1(1)     | 8(1)     | 0(1)     |
| N(5)  | 27(2)    | 27(2)    | 24(2)    | 0(1)     | 6(1)     | 1(1)     |
| C(1)  | 36(2)    | 24(2)    | 24(2)    | 3(2)     | 7(2)     | 0(2)     |
| C(2)  | 32(2)    | 27(2)    | 22(2)    | 3(2)     | 9(2)     | 1(2)     |
| C(3)  | 30(2)    | 31(2)    | 34(2)    | 1(2)     | 9(2)     | 2(2)     |
| C(4)  | 30(2)    | 33(2)    | 28(2)    | 0(2)     | 5(2)     | 6(2)     |
| C(5)  | 44(2)    | 23(2)    | 29(2)    | 2(2)     | 9(2)     | -2(2)    |
| C(6)  | 35(3)    | 25(2)    | 26(2)    | 1(2)     | 4(2)     | -4(2)    |
| C(7)  | 27(2)    | 34(2)    | 32(2)    | 2(2)     | -2(2)    | -2(2)    |
| C(8)  | 30(2)    | 30(2)    | 27(2)    | -1(2)    | -1(2)    | -1(2)    |
| C(9)  | 39(2)    | 30(2)    | 25(2)    | -3(2)    | 6(2)     | 1(2)     |
| C(10) | 40(2)    | 23(2)    | 26(2)    | -5(2)    | 5(2)     | -6(2)    |
| C(11) | 28(2)    | 26(2)    | 29(2)    | -4(2)    | 3(2)     | 3(2)     |
| C(12) | 28(2)    | 27(2)    | 21(2)    | -1(2)    | 5(2)     | 0(2)     |
| C(13) | 32(2)    | 26(2)    | 33(2)    | -1(2)    | 7(2)     | 1(2)     |
| C(14) | 38(2)    | 33(2)    | 31(2)    | -8(2)    | 5(2)     | -5(2)    |
| C(15) | 34(2)    | 40(2)    | 32(2)    | -6(2)    | 0(2)     | 0(2)     |
| C(16) | 32(2)    | 30(2)    | 29(2)    | -2(2)    | 0(2)     | 1(2)     |
| C(17) | 48(3)    | 38(2)    | 22(2)    | 7(2)     | 5(2)     | 8(2)     |
| P(1)  | 30(1)    | 30(1)    | 27(1)    | -1(1)    | 4(1)     | -1(1)    |
| F(1)  | 59(1)    | 31(1)    | 48(1)    | -7(1)    | 12(1)    | -4(1)    |
| F(2)  | 92(2)    | 36(1)    | 41(1)    | -13(1)   | 14(1)    | -14(1)   |
| F(3)  | 29(1)    | 80(2)    | 40(1)    | -1(1)    | 7(1)     | -6(1)    |
| F(4)  | 52(1)    | 54(1)    | 29(1)    | 9(1)     | 2(1)     | 3(1)     |
| F(5)  | 32(1)    | 68(2)    | 49(1)    | -3(1)    | 12(1)    | 4(1)     |
| F(6)  | 52(1)    | 49(1)    | 25(1)    | 9(1)     | 3(1)     | 5(1)     |



Table 1. Crystal data and structure refinement for sja4\_12.

|                                   |                                                                       |                 |
|-----------------------------------|-----------------------------------------------------------------------|-----------------|
| Identification code               | shelxl                                                                |                 |
| Empirical formula                 | C <sub>17</sub> H <sub>29</sub> Cl F <sub>6</sub> N <sub>5</sub> Ni P |                 |
| Formula weight                    | 542.58                                                                |                 |
| Temperature                       | 150(2) K                                                              |                 |
| Wavelength                        | 0.71073 Å                                                             |                 |
| Crystal system                    | monoclinic                                                            |                 |
| Space group                       | P21/c                                                                 |                 |
| Unit cell dimensions              | a = 11.6458(10) Å                                                     | α = 90°.        |
|                                   | b = 11.6930(12) Å                                                     | β = 97.680(7)°. |
|                                   | c = 15.6867(13) Å                                                     | γ = 90°.        |
| Volume                            | 2117.0(3) Å <sup>3</sup>                                              |                 |
| Z                                 | 4                                                                     |                 |
| Density (calculated)              | 1.702 Mg/m <sup>3</sup>                                               |                 |
| Absorption coefficient            | 1.186 mm <sup>-1</sup>                                                |                 |
| F(000)                            | 1120                                                                  |                 |
| Crystal size                      | 0.18 x 0.15 x 0.15 mm <sup>3</sup>                                    |                 |
| Theta range for data collection   | 2.48 to 27.50°.                                                       |                 |
| Index ranges                      | -15 ≤ h ≤ 14, 0 ≤ k ≤ 15, 0 ≤ l ≤ 19                                  |                 |
| Reflections collected             | 4710                                                                  |                 |
| Independent reflections           | 4710 [R(int) = 0.0000]                                                |                 |
| Completeness to theta = 27.50°    | 96.8 %                                                                |                 |
| Refinement method                 | Full-matrix least-squares on F <sup>2</sup>                           |                 |
| Data / restraints / parameters    | 4710 / 0 / 280                                                        |                 |
| Goodness-of-fit on F <sup>2</sup> | 0.810                                                                 |                 |
| Final R indices [I > 2σ(I)]       | R1 = 0.0639, wR2 = 0.1760                                             |                 |
| R indices (all data)              | R1 = 0.1144, wR2 = 0.1980                                             |                 |
| Largest diff. peak and hole       | 0.925 and -0.877 e.Å <sup>-3</sup>                                    |                 |

Table 2. Atomic coordinates ( $\times 10^4$ ) and equivalent isotropic displacement parameters ( $\text{\AA}^2 \times 10^3$ ) for sj4\_12.  $U(\text{eq})$  is defined as one third of the trace of the orthogonalized  $U^{ij}$  tensor.

|       | x       | y        | z       | $U(\text{eq})$ |
|-------|---------|----------|---------|----------------|
| C(1)  | 5182(5) | 8147(5)  | 1837(5) | 42(2)          |
| C(2)  | 5258(5) | 6895(5)  | 1612(5) | 49(2)          |
| C(3)  | 4119(6) | 5295(5)  | 929(4)  | 42(2)          |
| C(4)  | 2869(6) | 4963(5)  | 610(5)  | 54(2)          |
| C(5)  | 999(6)  | 6022(6)  | 480(5)  | 55(2)          |
| C(6)  | 891(6)  | 7108(6)  | 1038(5) | 50(2)          |
| C(7)  | 2043(5) | 8545(5)  | 1915(5) | 43(2)          |
| C(8)  | 3300(6) | 8914(5)  | 2167(4) | 43(2)          |
| C(9)  | 3597(6) | 6183(5)  | 2266(4) | 47(2)          |
| C(10) | 2337(6) | 6504(5)  | 2198(5) | 52(2)          |
| C(11) | 4164(5) | 9667(4)  | 931(4)  | 38(2)          |
| C(12) | 3087(5) | 9859(5)  | 300(4)  | 43(2)          |
| C(13) | 2858(6) | 10922(5) | -56(5)  | 45(2)          |
| C(14) | 1950(6) | 11043(6) | -696(5) | 57(2)          |
| C(15) | 1275(6) | 10104(6) | -949(5) | 56(2)          |
| C(16) | 1564(6) | 9070(6)  | -565(5) | 54(2)          |
| C(17) | 2006(7) | 5783(6)  | -755(5) | 60(2)          |
| N(1)  | 4037(4) | 8670(4)  | 1487(3) | 32(1)          |
| N(2)  | 4109(4) | 6346(4)  | 1452(3) | 34(1)          |
| N(3)  | 2210(5) | 5950(4)  | 172(4)  | 44(1)          |
| N(4)  | 1991(4) | 7398(4)  | 1538(3) | 38(1)          |
| N(5)  | 2427(4) | 8953(4)  | 57(3)   | 37(1)          |
| Cl(1) | 4404(1) | 7469(1)  | -480(1) | 42(1)          |
| P(1)  | 1421(1) | 2380(2)  | 1897(1) | 42(1)          |
| F(1)  | 1238(5) | 1098(4)  | 1549(4) | 88(2)          |
| F(2)  | 1618(6) | 3611(4)  | 2253(4) | 104(2)         |
| F(3)  | 1036(4) | 2799(4)  | 956(3)  | 63(1)          |
| F(4)  | 127(3)  | 2405(4)  | 2093(3) | 73(1)          |
| F(5)  | 1800(4) | 1862(4)  | 2831(3) | 71(1)          |
| F(6)  | 2719(4) | 2359(5)  | 1696(3) | 90(2)          |

|       |         |         |        |       |
|-------|---------|---------|--------|-------|
| Ni(1) | 3143(1) | 7464(1) | 636(1) | 31(1) |
|-------|---------|---------|--------|-------|

---

Table 3. Bond lengths [ $\text{\AA}$ ] and angles [ $^\circ$ ] for sja4\_12.

---

|             |            |
|-------------|------------|
| C(1)-N(1)   | 1.503(7)   |
| C(1)-C(2)   | 1.511(8)   |
| C(2)-N(2)   | 1.475(7)   |
| C(3)-N(2)   | 1.478(7)   |
| C(3)-C(4)   | 1.525(9)   |
| C(4)-N(3)   | 1.500(8)   |
| C(5)-N(3)   | 1.553(9)   |
| C(5)-C(6)   | 1.557(10)  |
| C(6)-N(4)   | 1.450(8)   |
| C(7)-N(4)   | 1.464(7)   |
| C(7)-C(8)   | 1.526(9)   |
| C(8)-N(1)   | 1.484(8)   |
| C(9)-N(2)   | 1.492(8)   |
| C(9)-C(10)  | 1.505(9)   |
| C(10)-N(4)  | 1.488(8)   |
| C(11)-N(1)  | 1.476(7)   |
| C(11)-C(12) | 1.507(8)   |
| C(12)-N(5)  | 1.333(7)   |
| C(12)-C(13) | 1.375(8)   |
| C(13)-C(14) | 1.364(9)   |
| C(14)-C(15) | 1.377(9)   |
| C(15)-C(16) | 1.372(9)   |
| C(16)-N(5)  | 1.311(8)   |
| C(17)-N(3)  | 1.456(9)   |
| N(1)-Ni(1)  | 2.117(4)   |
| N(2)-Ni(1)  | 2.057(4)   |
| N(3)-Ni(1)  | 2.153(5)   |
| N(4)-Ni(1)  | 2.077(5)   |
| N(5)-Ni(1)  | 2.085(5)   |
| Cl(1)-Ni(1) | 2.4302(16) |
| P(1)-F(2)   | 1.550(5)   |
| P(1)-F(3)   | 1.561(4)   |
| P(1)-F(4)   | 1.578(4)   |

|                   |          |
|-------------------|----------|
| P(1)-F(6)         | 1.585(5) |
| P(1)-F(5)         | 1.593(5) |
| P(1)-F(1)         | 1.600(5) |
|                   |          |
| N(1)-C(1)-C(2)    | 112.6(5) |
| N(2)-C(2)-C(1)    | 112.5(5) |
| N(2)-C(3)-C(4)    | 108.4(5) |
| N(3)-C(4)-C(3)    | 111.3(5) |
| N(3)-C(5)-C(6)    | 111.4(5) |
| N(4)-C(6)-C(5)    | 111.3(5) |
| N(4)-C(7)-C(8)    | 110.5(5) |
| N(1)-C(8)-C(7)    | 112.7(5) |
| N(2)-C(9)-C(10)   | 113.9(5) |
| N(4)-C(10)-C(9)   | 113.3(5) |
| N(1)-C(11)-C(12)  | 111.4(4) |
| N(5)-C(12)-C(13)  | 121.9(6) |
| N(5)-C(12)-C(11)  | 117.9(5) |
| C(13)-C(12)-C(11) | 120.0(5) |
| C(14)-C(13)-C(12) | 118.8(6) |
| C(13)-C(14)-C(15) | 119.1(6) |
| C(16)-C(15)-C(14) | 118.6(6) |
| N(5)-C(16)-C(15)  | 122.5(7) |
| C(11)-N(1)-C(8)   | 112.7(4) |
| C(11)-N(1)-C(1)   | 112.5(5) |
| C(8)-N(1)-C(1)    | 112.7(5) |
| C(11)-N(1)-Ni(1)  | 103.5(3) |
| C(8)-N(1)-Ni(1)   | 107.4(3) |
| C(1)-N(1)-Ni(1)   | 107.3(3) |
| C(2)-N(2)-C(3)    | 112.5(5) |
| C(2)-N(2)-C(9)    | 111.5(5) |
| C(3)-N(2)-C(9)    | 113.8(5) |
| C(2)-N(2)-Ni(1)   | 103.7(3) |
| C(3)-N(2)-Ni(1)   | 103.2(4) |
| C(9)-N(2)-Ni(1)   | 111.4(4) |
| C(17)-N(3)-C(4)   | 111.1(5) |

|                  |            |
|------------------|------------|
| C(17)-N(3)-C(5)  | 106.5(5)   |
| C(4)-N(3)-C(5)   | 109.3(6)   |
| C(17)-N(3)-Ni(1) | 117.1(4)   |
| C(4)-N(3)-Ni(1)  | 105.9(4)   |
| C(5)-N(3)-Ni(1)  | 106.8(4)   |
| C(6)-N(4)-C(7)   | 114.7(5)   |
| C(6)-N(4)-C(10)  | 110.5(5)   |
| C(7)-N(4)-C(10)  | 111.7(5)   |
| C(6)-N(4)-Ni(1)  | 104.2(4)   |
| C(7)-N(4)-Ni(1)  | 104.2(4)   |
| C(10)-N(4)-Ni(1) | 111.1(4)   |
| C(16)-N(5)-C(12) | 119.0(5)   |
| C(16)-N(5)-Ni(1) | 129.3(4)   |
| C(12)-N(5)-Ni(1) | 110.9(4)   |
| F(2)-P(1)-F(3)   | 93.4(3)    |
| F(2)-P(1)-F(4)   | 90.7(3)    |
| F(3)-P(1)-F(4)   | 91.0(2)    |
| F(2)-P(1)-F(6)   | 89.2(3)    |
| F(3)-P(1)-F(6)   | 88.8(3)    |
| F(4)-P(1)-F(6)   | 179.8(4)   |
| F(2)-P(1)-F(5)   | 90.7(3)    |
| F(3)-P(1)-F(5)   | 175.9(3)   |
| F(4)-P(1)-F(5)   | 88.9(3)    |
| F(6)-P(1)-F(5)   | 91.3(3)    |
| F(2)-P(1)-F(1)   | 178.6(3)   |
| F(3)-P(1)-F(1)   | 87.9(3)    |
| F(4)-P(1)-F(1)   | 89.8(3)    |
| F(6)-P(1)-F(1)   | 90.3(3)    |
| F(5)-P(1)-F(1)   | 88.0(3)    |
| N(2)-Ni(1)-N(4)  | 84.4(2)    |
| N(2)-Ni(1)-N(5)  | 162.85(18) |
| N(4)-Ni(1)-N(5)  | 94.1(2)    |
| N(2)-Ni(1)-N(1)  | 81.32(16)  |
| N(4)-Ni(1)-N(1)  | 84.46(19)  |
| N(5)-Ni(1)-N(1)  | 81.54(17)  |

|                  |            |
|------------------|------------|
| N(2)-Ni(1)-N(3)  | 84.06(18)  |
| N(4)-Ni(1)-N(3)  | 81.8(2)    |
| N(5)-Ni(1)-N(3)  | 112.67(18) |
| N(1)-Ni(1)-N(3)  | 160.8(2)   |
| N(2)-Ni(1)-Cl(1) | 96.69(15)  |
| N(4)-Ni(1)-Cl(1) | 176.36(13) |
| N(5)-Ni(1)-Cl(1) | 85.95(15)  |
| N(1)-Ni(1)-Cl(1) | 99.13(14)  |
| N(3)-Ni(1)-Cl(1) | 94.86(17)  |

---

Symmetry transformations used to generate equivalent atoms:

Table 4. Anisotropic displacement parameters ( $\text{\AA}^2 \times 10^3$ ) for sja4\_12. The anisotropic displacement factor exponent takes the form:  $-2\pi^2 [ h^2 a^{*2} U^{11} + \dots + 2 h k a^* b^* U^{12} ]$

|       | $U^{11}$ | $U^{22}$ | $U^{33}$ | $U^{23}$ | $U^{13}$ | $U^{12}$ |
|-------|----------|----------|----------|----------|----------|----------|
| C(1)  | 36(3)    | 39(3)    | 48(4)    | -4(3)    | -11(3)   | 1(2)     |
| C(2)  | 37(3)    | 39(3)    | 67(5)    | -1(3)    | -8(3)    | 7(3)     |
| C(3)  | 54(4)    | 28(3)    | 43(4)    | -4(3)    | 6(3)     | 8(2)     |
| C(4)  | 73(5)    | 30(3)    | 55(5)    | -5(3)    | -11(4)   | 4(3)     |
| C(5)  | 47(4)    | 44(3)    | 74(5)    | 4(3)     | 2(3)     | -12(3)   |
| C(6)  | 43(3)    | 55(4)    | 54(5)    | -2(3)    | 10(3)    | -4(3)    |
| C(7)  | 52(4)    | 30(3)    | 52(4)    | -1(3)    | 21(3)    | 0(2)     |
| C(8)  | 60(4)    | 30(3)    | 38(4)    | -4(3)    | 7(3)     | 0(3)     |
| C(9)  | 74(5)    | 30(3)    | 40(4)    | 5(3)     | 16(3)    | 5(3)     |
| C(10) | 70(5)    | 36(3)    | 54(5)    | -1(3)    | 23(4)    | -3(3)    |
| C(11) | 37(3)    | 27(3)    | 46(4)    | 4(2)     | -5(3)    | -6(2)    |
| C(12) | 48(3)    | 33(3)    | 45(4)    | 6(3)     | -2(3)    | -7(3)    |
| C(13) | 52(4)    | 37(3)    | 48(4)    | 0(3)     | 6(3)     | 1(3)     |
| C(14) | 58(4)    | 41(3)    | 70(5)    | 13(3)    | 2(4)     | 7(3)     |
| C(15) | 62(4)    | 54(4)    | 46(4)    | 9(3)     | -12(3)   | -2(3)    |
| C(16) | 56(4)    | 46(4)    | 55(5)    | 11(3)    | -13(3)   | 4(3)     |
| C(17) | 94(6)    | 49(4)    | 35(4)    | -6(3)    | 1(4)     | -20(4)   |
| N(1)  | 35(2)    | 26(2)    | 32(3)    | 2(2)     | -5(2)    | -1(2)    |
| N(2)  | 39(3)    | 29(2)    | 33(3)    | 1(2)     | 1(2)     | 2(2)     |
| N(3)  | 62(3)    | 33(2)    | 34(3)    | -5(2)    | -9(2)    | 2(2)     |
| N(4)  | 40(2)    | 44(3)    | 29(3)    | -8(2)    | 6(2)     | -6(2)    |
| N(5)  | 45(3)    | 33(2)    | 31(3)    | 2(2)     | -3(2)    | -6(2)    |
| Cl(1) | 47(1)    | 40(1)    | 41(1)    | -1(1)    | 11(1)    | -2(1)    |
| P(1)  | 39(1)    | 45(1)    | 39(1)    | -2(1)    | 2(1)     | -2(1)    |
| F(1)  | 125(4)   | 42(2)    | 95(4)    | -10(2)   | 7(3)     | -4(3)    |
| F(2)  | 170(6)   | 52(3)    | 94(4)    | -26(3)   | 36(4)    | -34(3)   |
| F(3)  | 59(2)    | 85(3)    | 42(3)    | 5(2)     | -1(2)    | 5(2)     |
| F(4)  | 47(2)    | 104(4)   | 71(3)    | 9(3)     | 20(2)    | 10(2)    |
| F(5)  | 75(3)    | 77(3)    | 59(3)    | 18(2)    | -1(2)    | 4(2)     |
| F(6)  | 43(2)    | 160(5)   | 68(3)    | -7(3)    | 3(2)     | -6(3)    |
| Ni(1) | 32(1)    | 29(1)    | 30(1)    | -1(1)    | 0(1)     | -1(1)    |



Table 1. Crystal data and structure refinement for sja26\_12.

|                                   |                                                                                  |                 |
|-----------------------------------|----------------------------------------------------------------------------------|-----------------|
| Identification code               | shelxl                                                                           |                 |
| Empirical formula                 | C <sub>17</sub> H <sub>29</sub> Cu F <sub>12</sub> N <sub>5</sub> P <sub>2</sub> |                 |
| Formula weight                    | 656.93                                                                           |                 |
| Temperature                       | 150(2) K                                                                         |                 |
| Wavelength                        | 0.71073 Å                                                                        |                 |
| Crystal system                    | monoclinic                                                                       |                 |
| Space group                       | P21/c                                                                            |                 |
| Unit cell dimensions              | a = 11.4577(9) Å                                                                 | α = 90°.        |
|                                   | b = 12.2495(14) Å                                                                | β = 95.837(6)°. |
|                                   | c = 17.1539(14) Å                                                                | γ = 90°.        |
| Volume                            | 2395.1(4) Å <sup>3</sup>                                                         |                 |
| Z                                 | 4                                                                                |                 |
| Density (calculated)              | 1.822 Mg/m <sup>3</sup>                                                          |                 |
| Absorption coefficient            | 1.157 mm <sup>-1</sup>                                                           |                 |
| F(000)                            | 1332                                                                             |                 |
| Crystal size                      | 0.20 x 0.20 x 0.20 mm <sup>3</sup>                                               |                 |
| Theta range for data collection   | 2.64 to 25.00°.                                                                  |                 |
| Index ranges                      | -13 ≤ h ≤ 13, 0 ≤ k ≤ 14, 0 ≤ l ≤ 20                                             |                 |
| Reflections collected             | 4213                                                                             |                 |
| Independent reflections           | 4213 [R(int) = 0.0000]                                                           |                 |
| Completeness to theta = 25.00°    | 99.7 %                                                                           |                 |
| Refinement method                 | Full-matrix least-squares on F <sup>2</sup>                                      |                 |
| Data / restraints / parameters    | 4213 / 0 / 334                                                                   |                 |
| Goodness-of-fit on F <sup>2</sup> | 0.716                                                                            |                 |
| Final R indices [I > 2σ(I)]       | R1 = 0.0574, wR2 = 0.1289                                                        |                 |
| R indices (all data)              | R1 = 0.1125, wR2 = 0.1389                                                        |                 |
| Largest diff. peak and hole       | 0.956 and -0.526 e.Å <sup>-3</sup>                                               |                 |

Table 2. Atomic coordinates ( $\times 10^4$ ) and equivalent isotropic displacement parameters ( $\text{\AA}^2 \times 10^3$ ) for sja26\_12.  $U(\text{eq})$  is defined as one third of the trace of the orthogonalized  $U^{ij}$  tensor.

|       | x        | y        | z       | $U(\text{eq})$ |
|-------|----------|----------|---------|----------------|
| C(1)  | 7936(7)  | 2084(8)  | 9436(4) | 60(2)          |
| C(2)  | 6689(6)  | 1897(6)  | 9099(4) | 44(2)          |
| C(3)  | 5078(7)  | 2812(9)  | 8248(5) | 75(3)          |
| C(4)  | 5018(8)  | 3245(14) | 7530(6) | 138(6)         |
| C(5)  | 5964(10) | 4973(9)  | 7369(6) | 96(4)          |
| C(6)  | 6924(9)  | 5539(9)  | 7875(5) | 82(3)          |
| C(7)  | 8565(7)  | 4931(8)  | 8879(5) | 62(3)          |
| C(8)  | 9010(6)  | 3860(7)  | 9296(4) | 49(2)          |
| C(9)  | 6096(8)  | 3742(7)  | 9377(5) | 65(3)          |
| C(10) | 6495(7)  | 4855(8)  | 9196(5) | 58(2)          |
| C(11) | 9490(6)  | 2248(7)  | 8541(4) | 47(2)          |
| C(12) | 9725(5)  | 2803(6)  | 7783(4) | 39(2)          |
| C(13) | 10795(6) | 2705(8)  | 7484(4) | 56(2)          |
| C(14) | 10909(7) | 3189(8)  | 6768(4) | 58(2)          |
| C(15) | 10016(6) | 3782(7)  | 6397(4) | 46(2)          |
| C(16) | 8976(6)  | 3840(7)  | 6737(4) | 49(2)          |
| C(17) | 6049(8)  | 3551(8)  | 6419(4) | 70(3)          |
| N(1)  | 8560(5)  | 2844(5)  | 8905(3) | 39(2)          |
| N(2)  | 6181(4)  | 2909(5)  | 8758(3) | 39(2)          |
| N(3)  | 6042(5)  | 3792(6)  | 7259(3) | 45(2)          |
| N(4)  | 7329(5)  | 4890(6)  | 8589(4) | 50(2)          |
| N(5)  | 8816(4)  | 3369(6)  | 7415(3) | 40(2)          |
| P(1)  | 7715(2)  | 471(2)   | 6666(1) | 38(1)          |
| P(2)  | 12810(2) | 3560(2)  | 4883(1) | 49(1)          |
| F(1)  | 7279(4)  | 1257(4)  | 7329(2) | 53(1)          |
| F(2)  | 6437(3)  | 521(4)   | 6196(2) | 53(1)          |
| F(3)  | 8087(4)  | 1506(4)  | 6198(2) | 55(1)          |
| F(4)  | 8146(4)  | -288(4)  | 6000(3) | 75(2)          |
| F(5)  | 8981(3)  | 419(4)   | 7134(2) | 56(1)          |
| F(6)  | 7307(4)  | -547(4)  | 7135(3) | 72(1)          |

|       |          |         |         |        |
|-------|----------|---------|---------|--------|
| F(7)  | 13083(5) | 3812(7) | 5773(3) | 129(3) |
| F(8)  | 11795(5) | 2772(6) | 5040(3) | 104(2) |
| F(9)  | 11905(8) | 4511(7) | 4820(5) | 180(4) |
| F(10) | 12519(4) | 3406(6) | 3982(2) | 88(2)  |
| F(11) | 13882(6) | 4255(8) | 4734(3) | 152(4) |
| F(12) | 13694(8) | 2642(8) | 4931(5) | 162(3) |
| Cu(1) | 7402(1)  | 3318(1) | 8020(1) | 33(1)  |

---

Table 3. Bond lengths [ $\text{\AA}$ ] and angles [ $^\circ$ ] for sja26\_12.

---

|             |           |
|-------------|-----------|
| C(1)-C(2)   | 1.504(10) |
| C(1)-N(1)   | 1.530(9)  |
| C(2)-N(2)   | 1.466(9)  |
| C(3)-C(4)   | 1.337(12) |
| C(3)-N(2)   | 1.466(9)  |
| C(4)-N(3)   | 1.467(11) |
| C(5)-N(3)   | 1.463(12) |
| C(5)-C(6)   | 1.500(13) |
| C(6)-N(4)   | 1.494(11) |
| C(7)-N(4)   | 1.452(10) |
| C(7)-C(8)   | 1.555(12) |
| C(8)-N(1)   | 1.481(10) |
| C(9)-C(10)  | 1.481(12) |
| C(9)-N(2)   | 1.484(9)  |
| C(10)-N(4)  | 1.484(9)  |
| C(11)-N(1)  | 1.481(8)  |
| C(11)-C(12) | 1.515(9)  |
| C(12)-N(5)  | 1.352(8)  |
| C(12)-C(13) | 1.383(9)  |
| C(13)-C(14) | 1.381(10) |
| C(14)-C(15) | 1.359(11) |
| C(15)-C(16) | 1.381(9)  |
| C(16)-N(5)  | 1.328(8)  |
| C(17)-N(3)  | 1.471(9)  |
| N(1)-Cu(1)  | 1.998(6)  |
| N(2)-Cu(1)  | 2.042(5)  |
| N(3)-Cu(1)  | 2.014(6)  |
| N(4)-Cu(1)  | 2.165(7)  |
| N(5)-Cu(1)  | 2.012(5)  |
| P(1)-F(6)   | 1.580(5)  |
| P(1)-F(3)   | 1.582(5)  |
| P(1)-F(5)   | 1.586(4)  |
| P(1)-F(4)   | 1.590(5)  |

|                   |          |
|-------------------|----------|
| P(1)-F(2)         | 1.598(4) |
| P(1)-F(1)         | 1.608(4) |
| P(2)-F(12)        | 1.510(8) |
| P(2)-F(11)        | 1.537(6) |
| P(2)-F(9)         | 1.556(7) |
| P(2)-F(8)         | 1.557(5) |
| P(2)-F(7)         | 1.558(5) |
| P(2)-F(10)        | 1.559(5) |
|                   |          |
| C(2)-C(1)-N(1)    | 110.3(6) |
| N(2)-C(2)-C(1)    | 110.4(6) |
| C(4)-C(3)-N(2)    | 118.6(8) |
| C(3)-C(4)-N(3)    | 120.3(8) |
| N(3)-C(5)-C(6)    | 118.8(8) |
| N(4)-C(6)-C(5)    | 112.2(9) |
| N(4)-C(7)-C(8)    | 113.0(7) |
| N(1)-C(8)-C(7)    | 114.7(6) |
| C(10)-C(9)-N(2)   | 116.0(6) |
| C(9)-C(10)-N(4)   | 114.1(7) |
| N(1)-C(11)-C(12)  | 109.8(6) |
| N(5)-C(12)-C(13)  | 122.7(7) |
| N(5)-C(12)-C(11)  | 115.8(5) |
| C(13)-C(12)-C(11) | 121.4(7) |
| C(14)-C(13)-C(12) | 117.4(7) |
| C(15)-C(14)-C(13) | 120.8(7) |
| C(14)-C(15)-C(16) | 118.1(7) |
| N(5)-C(16)-C(15)  | 123.3(7) |
| C(8)-N(1)-C(11)   | 111.9(6) |
| C(8)-N(1)-C(1)    | 113.8(5) |
| C(11)-N(1)-C(1)   | 110.5(6) |
| C(8)-N(1)-Cu(1)   | 105.9(5) |
| C(11)-N(1)-Cu(1)  | 105.9(4) |
| C(1)-N(1)-Cu(1)   | 108.3(4) |
| C(2)-N(2)-C(3)    | 116.9(7) |
| C(2)-N(2)-C(9)    | 110.4(6) |

|                  |          |
|------------------|----------|
| C(3)-N(2)-C(9)   | 111.6(7) |
| C(2)-N(2)-Cu(1)  | 100.7(4) |
| C(3)-N(2)-Cu(1)  | 104.7(4) |
| C(9)-N(2)-Cu(1)  | 112.0(4) |
| C(5)-N(3)-C(4)   | 110.4(9) |
| C(5)-N(3)-C(17)  | 109.3(7) |
| C(4)-N(3)-C(17)  | 107.7(7) |
| C(5)-N(3)-Cu(1)  | 104.7(5) |
| C(4)-N(3)-Cu(1)  | 104.7(6) |
| C(17)-N(3)-Cu(1) | 119.8(5) |
| C(7)-N(4)-C(10)  | 115.9(6) |
| C(7)-N(4)-C(6)   | 118.2(7) |
| C(10)-N(4)-C(6)  | 114.9(7) |
| C(7)-N(4)-Cu(1)  | 96.0(5)  |
| C(10)-N(4)-Cu(1) | 110.3(5) |
| C(6)-N(4)-Cu(1)  | 97.2(5)  |
| C(16)-N(5)-C(12) | 117.7(6) |
| C(16)-N(5)-Cu(1) | 130.9(5) |
| C(12)-N(5)-Cu(1) | 111.4(4) |
| F(6)-P(1)-F(3)   | 178.3(3) |
| F(6)-P(1)-F(5)   | 90.8(3)  |
| F(3)-P(1)-F(5)   | 90.5(2)  |
| F(6)-P(1)-F(4)   | 91.9(3)  |
| F(3)-P(1)-F(4)   | 89.1(3)  |
| F(5)-P(1)-F(4)   | 90.3(2)  |
| F(6)-P(1)-F(2)   | 89.1(2)  |
| F(3)-P(1)-F(2)   | 89.7(2)  |
| F(5)-P(1)-F(2)   | 179.8(3) |
| F(4)-P(1)-F(2)   | 89.7(2)  |
| F(6)-P(1)-F(1)   | 89.1(3)  |
| F(3)-P(1)-F(1)   | 89.9(2)  |
| F(5)-P(1)-F(1)   | 90.0(2)  |
| F(4)-P(1)-F(1)   | 179.0(3) |
| F(2)-P(1)-F(1)   | 90.0(2)  |
| F(12)-P(2)-F(11) | 83.1(5)  |

|                  |          |
|------------------|----------|
| F(12)-P(2)-F(9)  | 179.1(5) |
| F(11)-P(2)-F(9)  | 96.5(6)  |
| F(12)-P(2)-F(8)  | 92.1(5)  |
| F(11)-P(2)-F(8)  | 175.2(5) |
| F(9)-P(2)-F(8)   | 88.4(5)  |
| F(12)-P(2)-F(7)  | 91.6(4)  |
| F(11)-P(2)-F(7)  | 88.3(3)  |
| F(9)-P(2)-F(7)   | 89.2(4)  |
| F(8)-P(2)-F(7)   | 91.8(3)  |
| F(12)-P(2)-F(10) | 92.2(4)  |
| F(11)-P(2)-F(10) | 89.8(3)  |
| F(9)-P(2)-F(10)  | 87.0(4)  |
| F(8)-P(2)-F(10)  | 90.4(3)  |
| F(7)-P(2)-F(10)  | 175.5(5) |
| N(1)-Cu(1)-N(5)  | 83.9(2)  |
| N(1)-Cu(1)-N(3)  | 170.6(2) |
| N(5)-Cu(1)-N(3)  | 105.5(2) |
| N(1)-Cu(1)-N(2)  | 84.4(2)  |
| N(5)-Cu(1)-N(2)  | 164.9(3) |
| N(3)-Cu(1)-N(2)  | 86.5(2)  |
| N(1)-Cu(1)-N(4)  | 88.2(2)  |
| N(5)-Cu(1)-N(4)  | 106.0(2) |
| N(3)-Cu(1)-N(4)  | 88.5(2)  |
| N(2)-Cu(1)-N(4)  | 83.0(2)  |

---

Symmetry transformations used to generate equivalent atoms:

Table 4. Anisotropic displacement parameters ( $\text{\AA}^2 \times 10^3$ ) for sja26\_12. The anisotropic displacement factor exponent takes the form:  $-2\pi^2 [ h^2 a^{*2} U^{11} + \dots + 2 h k a^* b^* U^{12} ]$

|       | $U^{11}$ | $U^{22}$ | $U^{33}$ | $U^{23}$ | $U^{13}$ | $U^{12}$ |
|-------|----------|----------|----------|----------|----------|----------|
| C(1)  | 62(5)    | 79(7)    | 40(4)    | 24(4)    | 15(4)    | -2(5)    |
| C(2)  | 48(4)    | 53(6)    | 34(4)    | 4(4)     | 18(3)    | 0(4)     |
| C(3)  | 59(6)    | 99(8)    | 63(6)    | 22(5)    | -9(4)    | -26(5)   |
| C(4)  | 42(5)    | 284(19)  | 88(7)    | 69(10)   | 10(5)    | -36(9)   |
| C(5)  | 132(10)  | 73(8)    | 76(7)    | -5(6)    | -30(7)   | 55(7)    |
| C(6)  | 79(7)    | 94(9)    | 72(6)    | 11(6)    | 1(5)     | 3(6)     |
| C(7)  | 49(5)    | 81(7)    | 62(5)    | -28(5)   | 27(4)    | -21(5)   |
| C(8)  | 38(4)    | 75(6)    | 35(4)    | 2(4)     | 10(3)    | 6(4)     |
| C(9)  | 91(6)    | 57(6)    | 56(5)    | -3(5)    | 45(5)    | -6(5)    |
| C(10) | 38(4)    | 80(7)    | 59(5)    | -25(5)   | 21(4)    | -6(4)    |
| C(11) | 42(4)    | 67(6)    | 34(4)    | 1(4)     | 8(3)     | 13(4)    |
| C(12) | 26(4)    | 57(5)    | 35(4)    | -8(4)    | 3(3)     | 3(4)     |
| C(13) | 33(4)    | 88(7)    | 48(4)    | -11(5)   | 13(3)    | 5(4)     |
| C(14) | 54(5)    | 80(7)    | 46(4)    | -20(5)   | 33(4)    | -14(5)   |
| C(15) | 34(4)    | 69(6)    | 37(4)    | -3(4)    | 13(3)    | -12(4)   |
| C(16) | 48(4)    | 63(6)    | 38(4)    | 1(4)     | 10(3)    | -8(4)    |
| C(17) | 74(6)    | 96(9)    | 38(4)    | 9(5)     | 0(4)     | 8(6)     |
| N(1)  | 33(3)    | 61(5)    | 24(3)    | -5(3)    | 10(2)    | -8(3)    |
| N(2)  | 28(3)    | 58(5)    | 34(3)    | 2(3)     | 15(2)    | -7(3)    |
| N(3)  | 42(3)    | 58(5)    | 36(3)    | 1(3)     | 10(3)    | 3(3)     |
| N(4)  | 36(3)    | 59(5)    | 56(4)    | 8(3)     | 12(3)    | 1(3)     |
| N(5)  | 32(3)    | 58(4)    | 31(3)    | -1(3)    | 14(2)    | 2(3)     |
| P(1)  | 32(1)    | 48(1)    | 37(1)    | -2(1)    | 9(1)     | 0(1)     |
| P(2)  | 37(1)    | 79(2)    | 34(1)    | -5(1)    | 13(1)    | -10(1)   |
| F(1)  | 56(2)    | 73(3)    | 33(2)    | -2(2)    | 21(2)    | 13(2)    |
| F(2)  | 38(2)    | 71(3)    | 48(2)    | 12(2)    | 2(2)     | 2(2)     |
| F(3)  | 66(3)    | 67(3)    | 34(2)    | 4(2)     | 20(2)    | -17(2)   |
| F(4)  | 63(3)    | 82(4)    | 81(3)    | -45(3)   | 15(2)    | 5(3)     |
| F(5)  | 38(2)    | 65(3)    | 64(3)    | -5(2)    | 4(2)     | 0(2)     |
| F(6)  | 58(3)    | 65(3)    | 90(4)    | 32(3)    | 0(2)     | -12(3)   |



|       |         |         |        |        |       |         |
|-------|---------|---------|--------|--------|-------|---------|
| F(7)  | 75(4)   | 276(9)  | 39(3)  | -30(4) | 19(2) | -65(5)  |
| F(8)  | 108(4)  | 146(6)  | 63(3)  | -12(3) | 30(3) | -68(4)  |
| F(9)  | 227(10) | 155(8)  | 151(7) | -41(6) | -6(6) | 115(8)  |
| F(10) | 73(3)   | 152(6)  | 41(2)  | -19(3) | 13(2) | -29(4)  |
| F(11) | 130(5)  | 256(10) | 75(4)  | -14(5) | 34(4) | -133(6) |
| F(12) | 147(7)  | 188(9)  | 153(7) | 30(6)  | 21(5) | 82(7)   |
| Cu(1) | 25(1)   | 51(1)   | 24(1)  | 2(1)   | 10(1) | 2(1)    |

---
